# Supplementary material for: Psoralidin–cucurbit[7]uril complex with improved solubility to tackle human colorectal cancer: experimental and computational study
Source: Royal Society of Chemistry journal article supplement (doi:10.1039/d3ma00521f), 2023-01-01
Supplement: d3ma00521f1.pdf [file d3ma00521f1.pdf]

## Supporting Information

### **Psoralidin-Cucurbit[7]uril Complex with Improved Solubility to Tackle Human Colorectal Cancer: an Experimental and Computational Study**

**Fortuna Ponte<sup>1a</sup>, Nada K. Sedky<sup>2a</sup>, Iten M. Fawzy<sup>3</sup>, Fatma Mokhtar<sup>4</sup>, Emilia Sicilia<sup>1\*</sup>, Sherif Ashraf Fahmy<sup>5\*</sup>**

<sup>1</sup> Department of Chemistry and Chemical Technologies, University of Calabria, Arcavacata di Rende 87036, Italy

<sup>2</sup>Department of Biochemistry, School of Life and Medical Sciences, University of Hertfordshire Hosted by Global Academic Foundation, R5 New Garden City, New Administrative Capital, Cairo, Egypt

<sup>3</sup>Department of Pharmaceutical Chemistry, Faculty of Pharmacy, Future University in Egypt, 11835 Cairo, Egypt.

<sup>4</sup>Department of Pharmacognosy, Faculty of Pharmacy, El Saleheya El Gadida University, 23 El Saleheya El Gadida 44813, Sharkia, Egypt.

<sup>5</sup>Department of Chemistry, School of Life and Medical Sciences, University of Hertfordshire Hosted by Global Academic Foundation, R5 New Garden City, New Capital, Cairo 11835, Egypt.

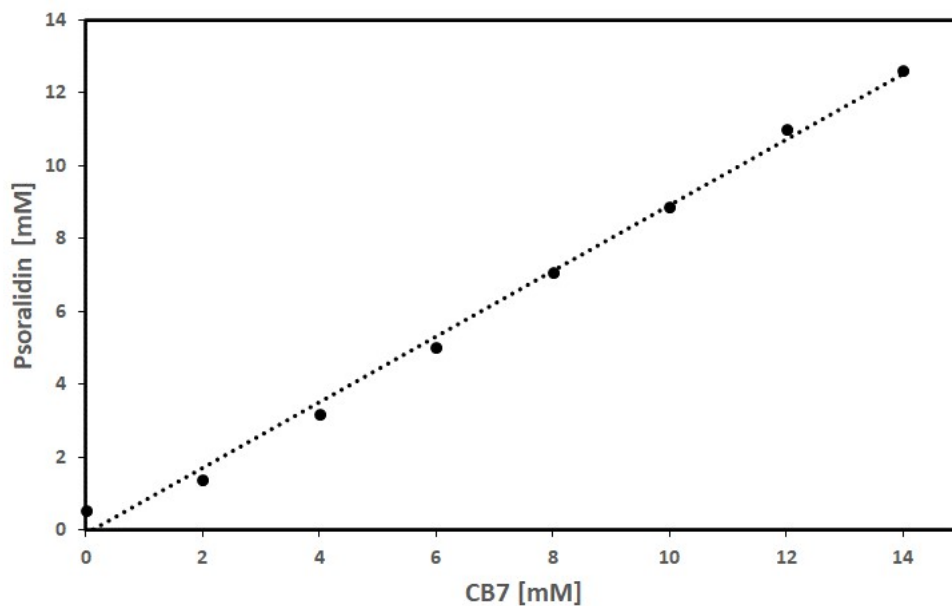

**Figure S1.** Phase solubility diagram of Ps in aqueous solutions containing increasing concentrations of CB7 at 24 °C.

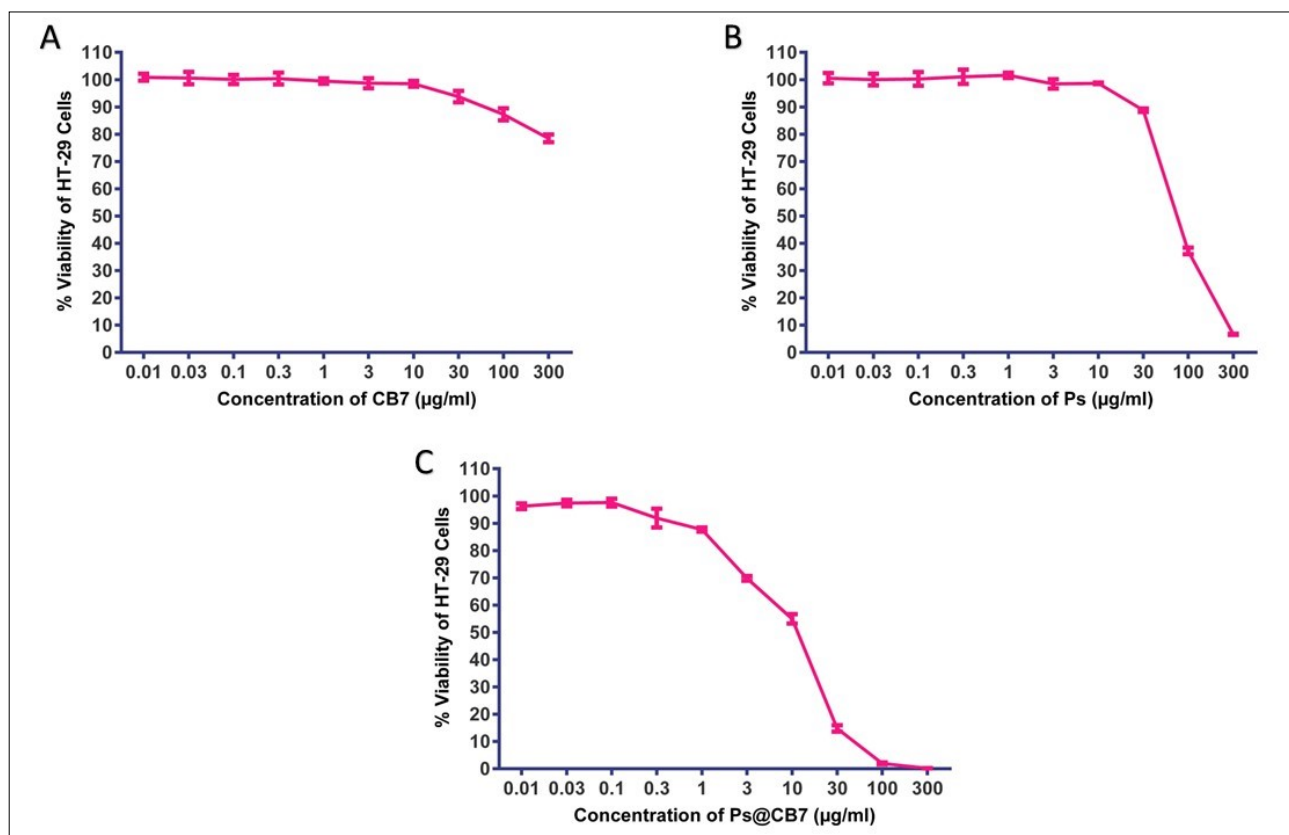

**Figure S2.** Cellular viability Percent of HT-29 cells following exposure to CB7 only (A), Ps only (B) and Ps@CB7 (C) for 48 h. Data are displayed as triplicates  $\pm$  SD.

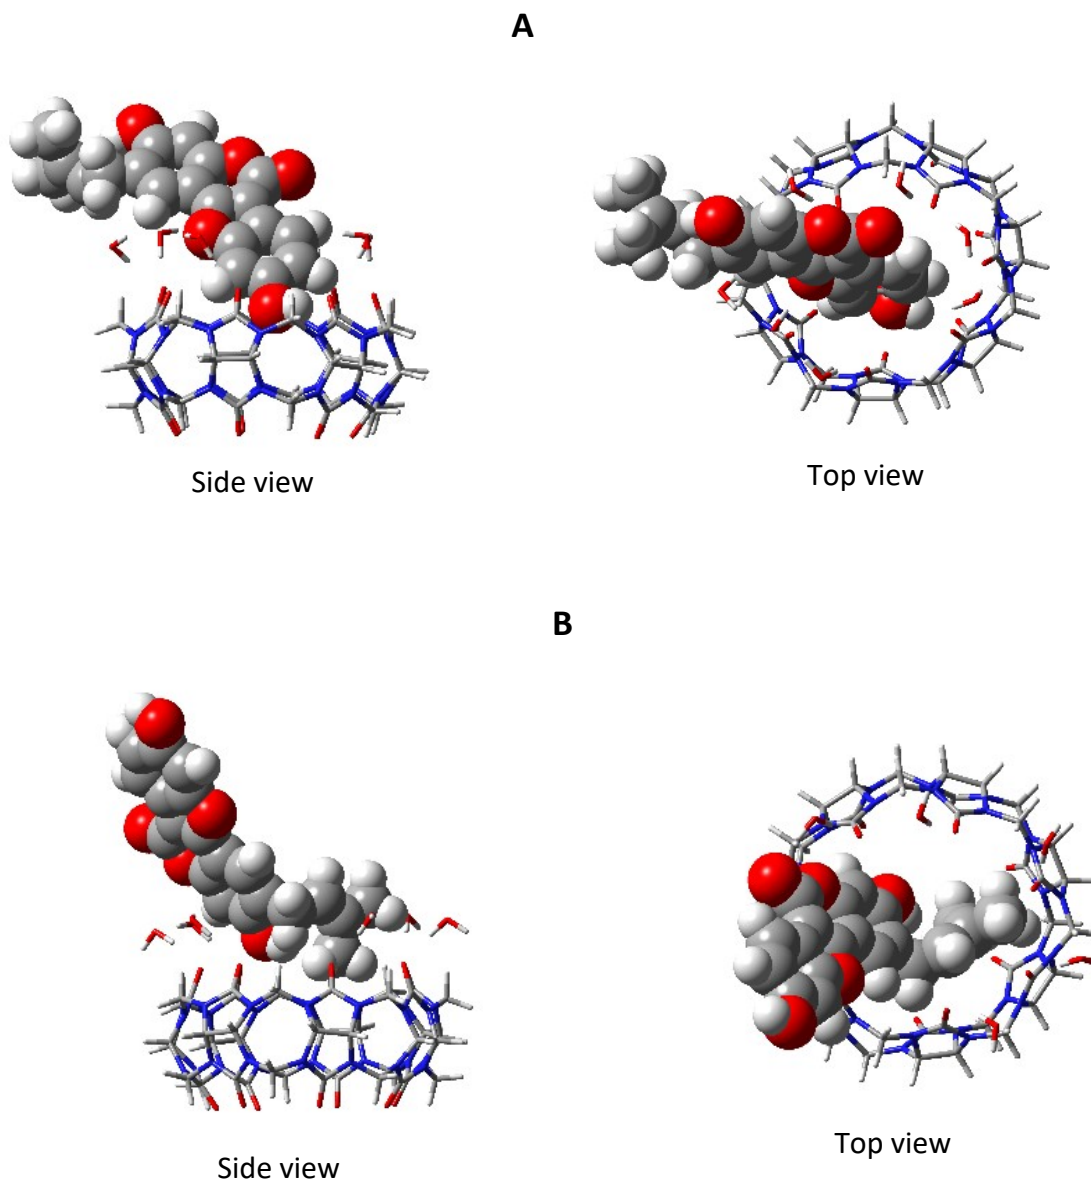

**Figure S3.** Side and top views of the representation of the Ps-CB7 A and B arrangements, in which a model of interpenetrating spheres of van der Waals radii has been used for the guest.
